# Supplementary material
Source: publisher figshare collection journal article supplement (https://future-science-group.figshare.com/ndownloader/files/31609427)
Supplement: Supplementary file 1 [file 31609427]

TableS1: Characteristics of NSCLC patients for SNORD83A in TCGA

| **Parameters** | **Samples，n** | **SnoRD83A expression** | |
| --- | --- | --- | --- |
| **Log2(FPKM+1)** | ***P*-value** |
| **Age (years)** |  |  |  |
| ≤67 | 485 | 7.552(6.580-8.549) | 0.3685 |
| >67 | 477 | 7.492(6.303-8.626) |  |
| Not Available | 27 |  |  |
| **Gender** |  |  |  |
| male | 592 | 7.825(6.885-8.730) | **0.0000** |
| female | 397 | 7.106(6.071-8.155) |  |
| **Smoking** |  |  |  |
| <40 | 377 | 7.319(6.391-8.504) | **0.0000** |
| ≥40 | 378 | 7.864(6.990-8.716) |  |
| Not Available | 234 |  |  |
| **Histology** |  |  |  |
| AC | 513 | 6.788(5.879-7.754) | **0.0000** |
| SCC | 476 | 8.215(7.380-9.031) |  |
| **T stage** |  |  |  |
| T1 | 276 | 7.298(6.088-8.200) | **0.0020** |
| T2 | 554 | 7.642 (6.593-8.669) |  |
| T3 | 115 | 7.574(6.598-8.559) |  |
| T4 | 41 | 7.922(6.704-8.828) |  |
| TX | 3 |  |  |
| **LN meta.** |  |  |  |
| N0 | 630 | 7.528(6.397-8.558) | 0.1596 |
| N1 | 221 | 7.648(6.677-8.573) |  |
| N2 | 114 | 7.479(6.466-8.579) |  |
| N3 | 6 | 8.886(7.245-10.63) |  |
| NX | 18 |  |  |
| **Distant meta.** |  |  |  |
| M0 | 735 | 7.709(6.687-8.727) | 0.1562 |
| M1 | 29 | 7.263(6.247-8.234) |  |
| MX | 225 |  |  |
| **TNM stage** |  |  |  |
| I | 507 | 7.454(6.338-8.618) | 0.3088 |
| II | 277 | 7.609(6.657-8.417) |  |
| III | 164 | 7.630(6.599-8.702) |  |
| IV | 30 | 7.193(6.146-8.218) |  |
| Not Available | 11 |  |  |

*AC, adenocarcinoma; SCC, squamous cell carcinoma; Bold values: significant difference.*
